# Supplementary material for: Optimization of local orientation and vertical phase separation by adding a volatilizable solid additive to the J51:N2200 blend to improve its photovoltaic performance
Source: Royal Society of Chemistry journal article supplement (doi:10.1039/d1tc00240f), 2021-01-01
Supplement: d1tc00240f1.pdf [file d1tc00240f1.pdf]

## Supporting Information

### Optimization of Local Orientation and Vertical Phase Separation by Adding a Volatilizable Solid Additives to J51:N2200 Blend to Improve its Photovoltaic Performance

Ye Yan,<sup>a,b</sup> Yadi Liu,<sup>a,b</sup> Jidong Zhang,<sup>a,b</sup> Qiang Zhang\*<sup>a</sup> and Yanchun Han <sup>\*a,b</sup>

<sup>a</sup> *State Key Laboratory of Polymer Physics and Chemistry, Changchun Institute of Applied Chemistry, Chinese Academy of Sciences, Changchun 130022, P. R. China;*

<sup>b</sup> *University of Science and Technology of China, Hefei,  
230026, P. R. China.*

Tel: 86-431-85262175, Fax: 86-431-85262126,

Email: [zhqawh@ciac.ac.cn](mailto:zhqawh@ciac.ac.cn), [ychan@ciac.ac.cn](mailto:ychan@ciac.ac.cn)

\* To whom correspondence should be addressed

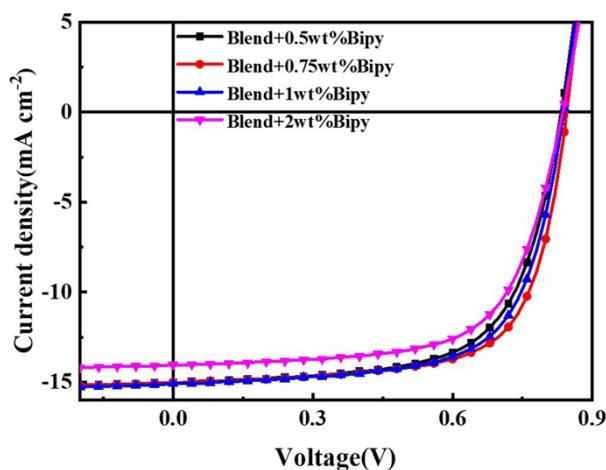

Fig. 1 The photovoltaic properties of J51:N2200 blend for the varying content of Bipy.

Table 1. The summary of parameters of photovoltaic properties for J51:N2200 devices varying content of Bipy.

|                     | $V_{oc}$<br>(V) | $J_{sc}$<br>(mA cm <sup>-2</sup> ) | $FF$<br>(%) | PCE<br>(%) |
|---------------------|-----------------|------------------------------------|-------------|------------|
| Blend+0.5 wt% Bipy  | 0.83            | 15.04                              | 65.58       | 8.22       |
| Blend+0.75 wt% Bipy | 0.85            | 15.02                              | 68.63       | 8.73       |
| Blend+1 wt% Bipy    | 0.84            | 15.09                              | 66.97       | 8.48       |
| Blend+2 wt% Bipy    | 0.84            | 14.04                              | 65.80       | 7.73       |

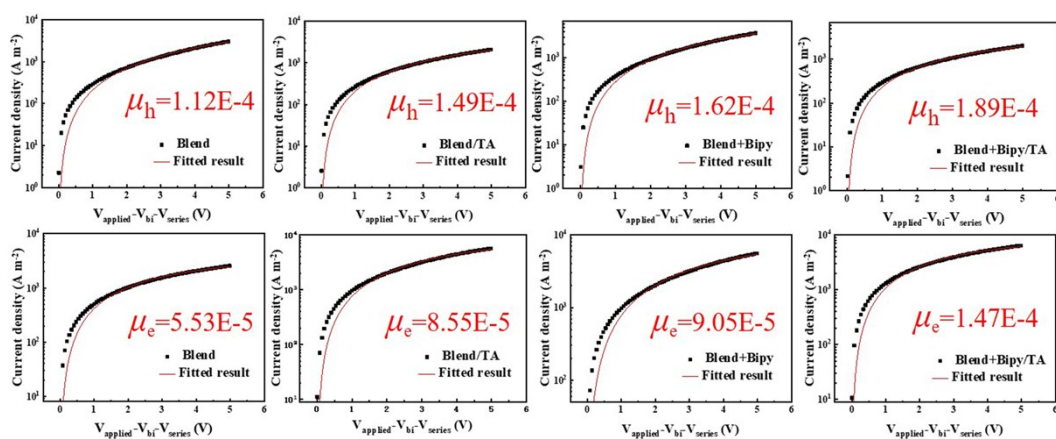

Fig. 2 The hole and electron mobility of films at different conditions: Blend, Blend/TA, Blend+Bipy, Blend+Bipy/TA.

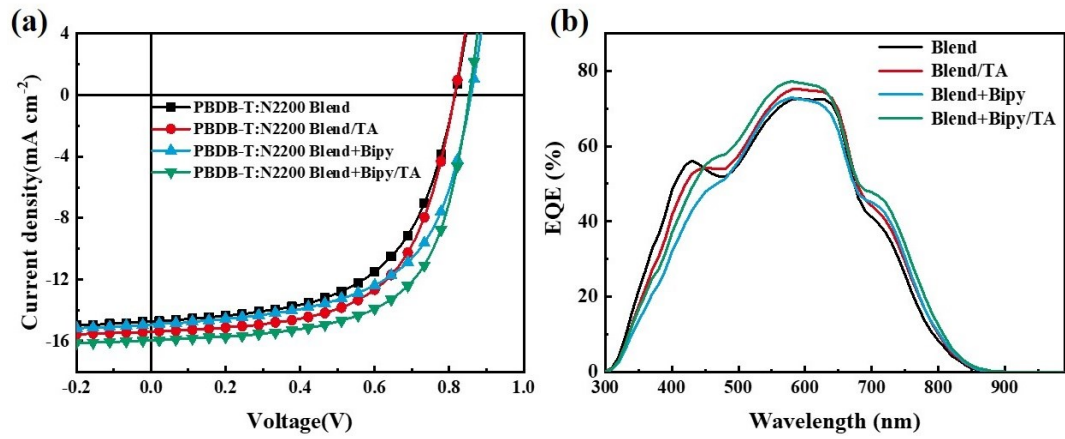

Fig. 3 The photovoltaic properties of PBDB-T:N2200 blend on different conditions (a) The  $J$ - $V$  curves. (b) The EQE data.

Table 2. The summary of corresponding parameters of the dependence of photovoltaic properties of PBDB-T:N2200 on different conditions.

| PBDB-T:N2200  | $V_{oc}$<br>(V) | $J_{sc}$<br>(mA cm <sup>-2</sup> ) | $FF$<br>(%) | PCE<br>(%) |
|---------------|-----------------|------------------------------------|-------------|------------|
| Blend         | 0.82            | 14.73                              | 57.40       | 6.89       |
| Blend/TA      | 0.81            | 15.37                              | 60.70       | 7.61       |
| Blend+Bipy    | 0.86            | 14.93                              | 58.97       | 7.56       |
| Blend+Bipy/TA | 0.86            | 15.95                              | 62.92       | 8.59       |

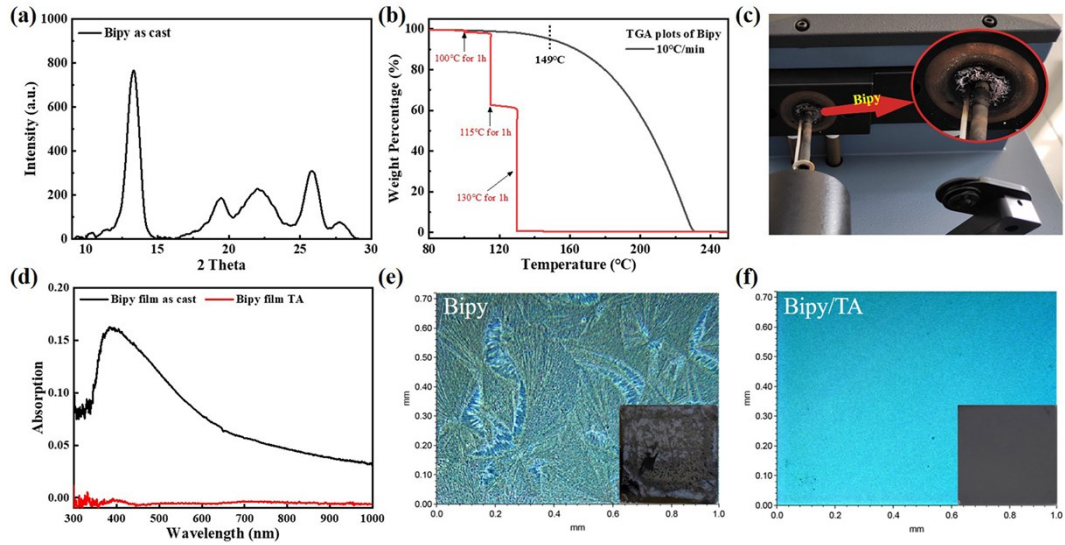

Fig. 4 (a) The GIXRD pattern of Bipy thin film. (b) Thermogravimetric Analysis (TGA) of Bipy, the scan rate is  $10\text{ }^{\circ}\text{C}\text{ min}^{-1}$ , the black line corresponding heating from  $25\text{ }^{\circ}\text{C}$  to  $300\text{ }^{\circ}\text{C}$ , while the red line corresponding heating from  $25\text{ }^{\circ}\text{C}$  to  $200\text{ }^{\circ}\text{C}$  and the temperatures were held for 1h at 100, 115, 130  $^{\circ}\text{C}$ , respectively. (c) Photograph of the top of crucible after the heating and cooling of Bipy. (d) The UV-vis absorption spectra of Bipy film before and after annealing at  $130\text{ }^{\circ}\text{C}$  for 10 min. (e) Morphology of Bipy spin-coated on Si substrates, (f) The Bipy films were thermal annealing at  $130\text{ }^{\circ}\text{C}$  for 10 min characterized by optical profiler (Insert photos are taken by the camera.)

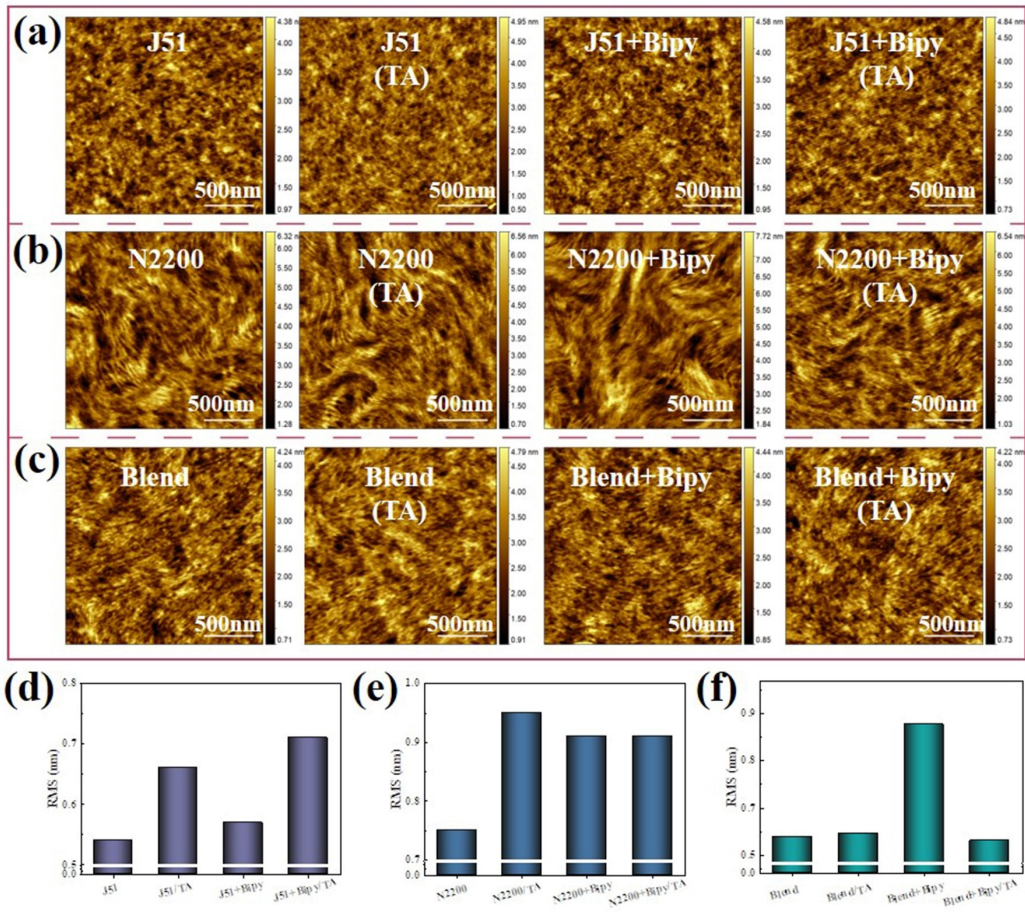

Fig. 5 (a-c) AFM height images of films processed under different conditions. (d-f) The roughness for corresponding films.

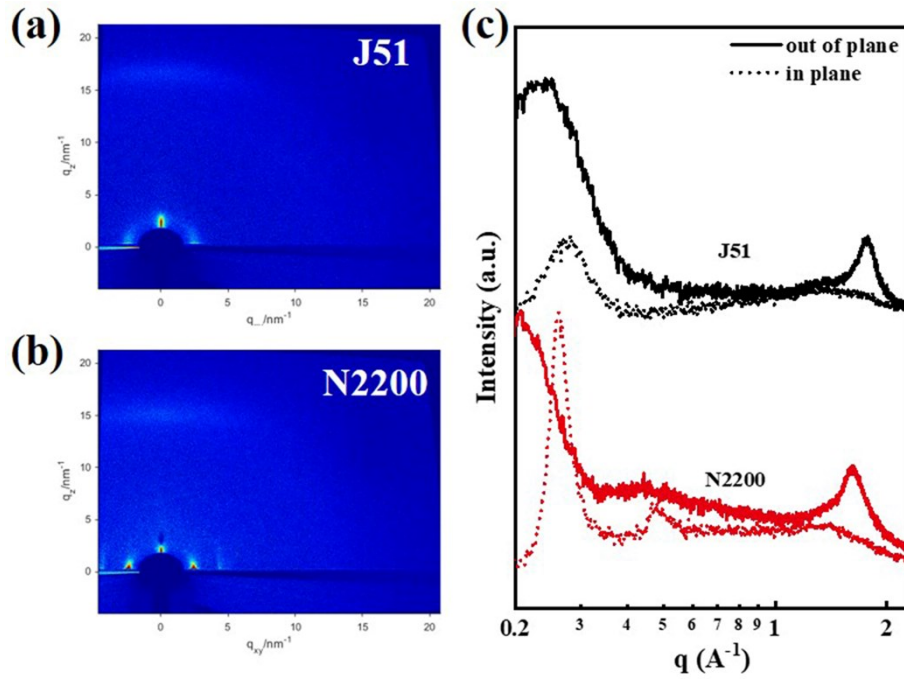

Fig.6 The GIXRD spectra of different films. (a) J51 film, (b) N2200 film, (c) The 1D linecuts for 2D GIXRD.

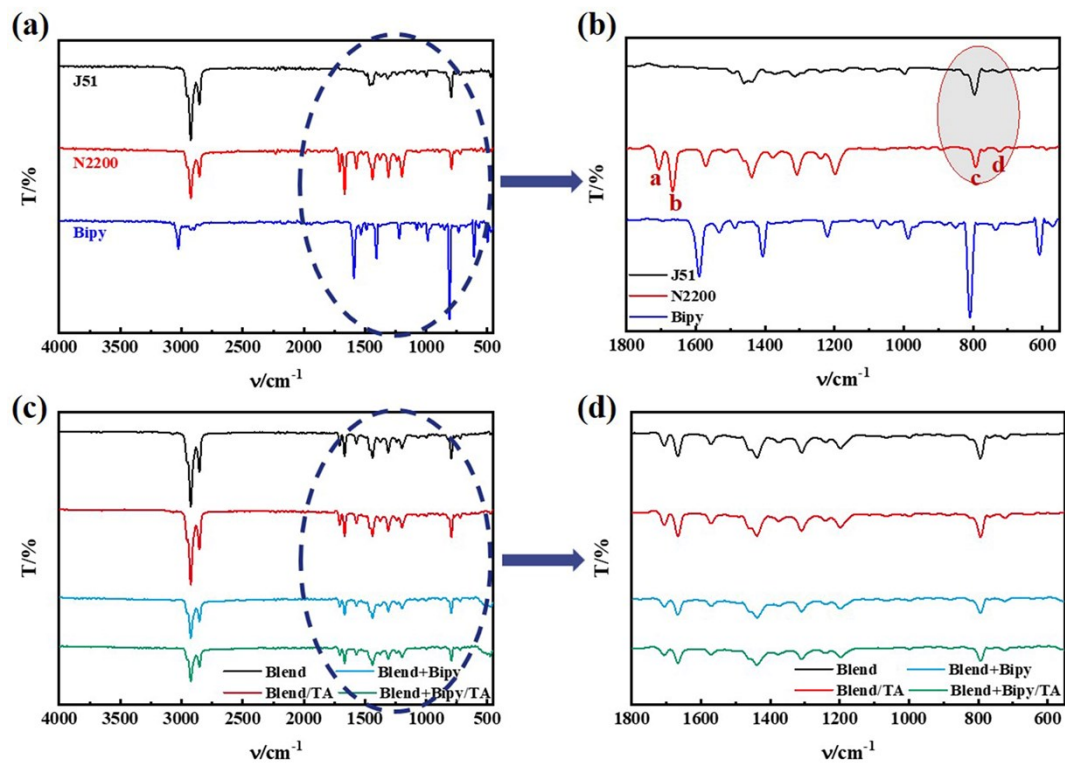

Fig. 7 IR spectra of film. All tested films were spin-coated on KBr pellets. (a) The IR spectra of pure component films for J51, N2200, and Bipy. (b) The enlarged of Figure (a) from 1800-550  $\text{cm}^{-1}$ . (c) The IR spectra of blend films at different treatments, Blend, Blend/TA, Blend+Bipy, Blend +Bipy/TA. (d) The enlarged of Figure (c) from 1800-550 $\text{cm}^{-1}$ .



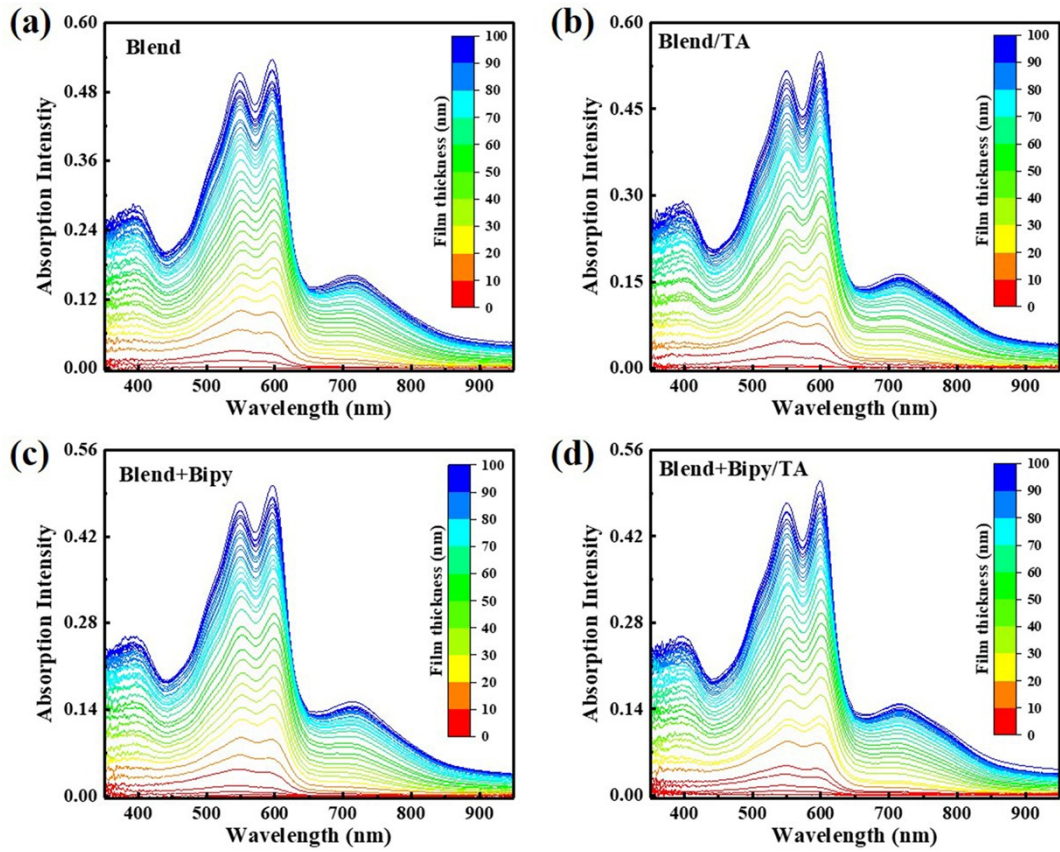

Fig. 8 Absorption spectrum of films (100 nm thick) during incremental etching. (a) Blend, (b) Blend/TA, (c) Blend+Bipy, (d) Blend+Bipy/TA.

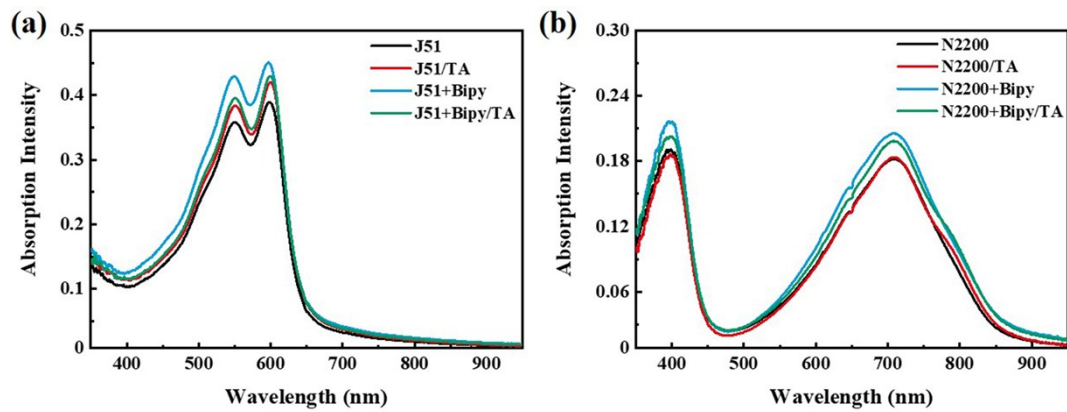

Fig. 9 Absorption spectra of pure component film. (a) J51, J51/TA, J51+Bipy, J51+Bipy/TA. (b) N2200, N2200/TA, N2200+Bipy, N2200+Bipy/TA.
